# Supplementary material for: Genetic Diversity of the Hepatitis B Virus Subgenotypes in Brazil
Source: PubMed Central journal article supplement (PMC6784006; doi:10.3390/v11090860), 2019-09-15
Supplement: viruses-11-00860-s001.pdf [file viruses-11-00860-s001.pdf]

**Table S1:** Sequences used in HBV complete genome phylogenetic analyses

**HBV/A**

| <b>Genbank accession number</b> | <b>Subenotype*</b>     | <b>Location</b> |
|---------------------------------|------------------------|-----------------|
| KF922437                        | A1                     | South Africa    |
| KJ854707                        | A1                     | Brazil          |
| AY233286                        | A2                     | South Africa    |
| AB453979                        | A2                     | Japan           |
| AY934764                        | A3 ( <i>quasi-A3</i> ) | Gambia          |
| FN545825                        | A3 ( <i>quasi-A3</i> ) | Nigeria         |
| GQ161813                        | A3 ( <i>quasi-A3</i> ) | Guinea          |
| AY934764                        | A4 ( <i>quasi-A3</i> ) | Gambia          |
| AM180623                        | A4 ( <i>quasi-A3</i> ) | Mali            |
| FJ692554                        | A5 ( <i>quasi-A3</i> ) | Nigeria         |
| FJ692556                        | A5 ( <i>quasi-A3</i> ) | Nigeria         |
| GQ331047                        | A6 (new A4)            | Belgium         |
| GQ331048                        | A6 (new A4)            | Belgium         |

**HBV/B**

| <b>Genbank accession number</b> | <b>Subenotype*</b> | <b>Location</b> |
|---------------------------------|--------------------|-----------------|
| AB900112                        | B1                 | Japan           |
| AB981583                        | B2                 | Japan           |
| JX869999                        | B2                 | Panama          |
| MG372436                        | B2                 | China           |
| KP341009                        | B3                 | Indonesia       |
| KP341010                        | B4                 | Viet Nam        |
| KP341012                        | B7                 | Indonesia       |
| KP341013                        | B9                 | Indonesia       |
| KP659255                        | B6                 | Indonesia       |

**HBV/C**

| <b>Genbank accession number</b> | <b>Subenotype*</b> | <b>Location</b> |
|---------------------------------|--------------------|-----------------|
| JX507214                        | C1                 | Panama          |
| JQ801522                        | C1                 | Thailand        |
| HQ622095                        | C2                 | Brazil          |
| JN315779                        | C2                 | South Korea     |
| KU679960                        | C4                 | Australia       |
| KU695741                        | C3                 | Australia       |
| KU695746                        | C3                 | Australia       |

|          |    |             |
|----------|----|-------------|
| KF873511 | C4 | Australia   |
| KM999992 | C5 | Philippines |
| JN827415 | C5 | Thailand    |
| KM999993 | C6 | Indonesia   |
| EU670263 | C6 | Philippines |

### **HBV/D**

| <b>Genbank accession number</b> | <b>Subenotype*</b> | <b>Location</b> |
|---------------------------------|--------------------|-----------------|
| KY382412                        | D1                 | Argentina       |
| GU357846                        | D1                 | China           |
| KP322601                        | D2                 | India           |
| KU736925                        | D2                 | Sudan           |
| KP090181                        | D3                 | Brazil          |
| KP322602                        | D3                 | India           |
| KC012652                        | D3                 | Argentina       |
| KJ470898                        | D4                 | Brazil          |
| GQ922004                        | D4                 | Canada          |
| KP322603                        | D5                 | India           |
| KF170740                        | D6                 | Sudan           |
| KU736923                        | D7                 | Somalia         |
| KP322604                        | D7                 | Tunisia         |

### **HBV/E**

| <b>Genbank accession number</b> | <b>Location</b>          |
|---------------------------------|--------------------------|
| AM494710                        | Central African Republic |
| KF849722                        | Angola                   |
| KT192626                        | Mexico                   |

### **HBV/F**

| <b>Genbank accession number</b> | <b>Subenotype*</b> | <b>Location</b> |
|---------------------------------|--------------------|-----------------|
| KP995098                        | F1                 | Venezuela       |
| KX264496                        | F1                 | Chile           |
| KT896494                        | F2                 | Brazil          |
| KP995115                        | F2                 | Venezuela       |
| FJ589067                        | F3                 | Colombia        |
| MH051987                        | F3                 | Venezuela       |
| JX079937                        | F4                 | Argentina       |
| KP995118                        | F4                 | Argentina       |

\* according to the information available in Genbank

**HBV/G**

| <b>Genbank accession number</b> | <b>Location</b> |
|---------------------------------|-----------------|
| GU565217                        | Netherlands     |
| KF414679                        | Venezuela       |

**HBV/H**

| <b>Genbank accession number</b> | <b>Location</b> |
|---------------------------------|-----------------|
| AB298362                        | Japan           |
| HM117850                        | Mexico          |

**HBV/I**

| <b>Genbank accession number</b> | <b>Location</b> |
|---------------------------------|-----------------|
| GU357844                        | China           |
| KF214650                        | India           |

**HBV/J**

| <b>Genbank accession number</b> | <b>Location</b> |
|---------------------------------|-----------------|
| AB486012                        | Japan           |
